# Supplementary material for: Identification of Potential Cerebrospinal Fluid Biomarkers To Discriminate between Infection and Sterile Inflammation in a Rat Model of Staphylococcus epidermidis Catheter Infection
Source: PubMed Central journal article supplement (PMC6704599; doi:10.1128/iai.00311-19), 2019-08-21
Supplement: IAI.00311-19-s0001.pdf [file IAI.00311-19-s0001.pdf]

## SUPPLEMENTARY INFORMATION

**Table 1:** Biological processes enriched at days 1 and 5 post-infection.

|                                                            | <b>PANTHER GO-Slim Biological Process</b>                  | <b>Total Reference Proteins</b>                          | <b>Number of Proteins</b> | <b><i>p</i>-value</b> |
|------------------------------------------------------------|------------------------------------------------------------|----------------------------------------------------------|---------------------------|-----------------------|
| <b>Day 1 Post-Infection</b>                                | Negative regulation of endopeptidase activity (GO:0010951) | 7                                                        | 2                         | 2.12E-05              |
|                                                            | Negative regulation of peptidase activity (GO:0010466)     | 10                                                       | 2                         | 3.87E-05              |
|                                                            | Negative regulation of hydrolase activity (GO:0051346)     | 18                                                       | 2                         | 1.11E-04              |
|                                                            | Cellular protein metabolic process (GO:0044267)            | 130                                                      | 7                         | 6.78E-12              |
|                                                            | Protein metabolic process (GO:0019538)                     | 449                                                      | 7                         | 3.00E-08              |
|                                                            | Macromolecule metabolic process (GO:0043170)               | 1583                                                     | 7                         | 1.20E-04              |
|                                                            | <b>Day 5 Post-Infection</b>                                | Positive regulation of biosynthetic process (GO:0009891) | 4                         | 2                     |
| Acylglycerol catabolic process (GO:0046464)                |                                                            | 11                                                       | 2                         | 2.34E-04              |
| Lipoprotein metabolic process (GO:0042157)                 |                                                            | 11                                                       | 2                         | 2.34E-04              |
| Negative regulation of endopeptidase activity (GO:0010951) |                                                            | 7                                                        | 4                         | 2.71E-09              |
| Negative regulation of peptidase activity (GO:0010466)     |                                                            | 10                                                       | 4                         | 8.19E-09              |
| Negative regulation of hydrolase activity (GO:0051346)     |                                                            | 18                                                       | 4                         | 5.93E-08              |
| Negative regulation of catalytic activity (GO:0043086)     |                                                            | 49                                                       | 4                         | 2.28E-06              |
| Proteolysis (GO:0006508)                                   |                                                            | 137                                                      | 4                         | 1.10E-04              |
| Cellular protein metabolic process (GO:0044267)            |                                                            | 130                                                      | 12                        | 1.00E-17              |
| Protein metabolic process (GO:0019538)                     |                                                            | 449                                                      | 18                        | 1.88E-20              |
| Macromolecule metabolic process (GO:0043170)               |                                                            | 1583                                                     | 19                        | 3.01E-12              |
| Organic substance metabolic process (GO:0071704)           |                                                            | 1998                                                     | 19                        | 1.68E-10              |
| Metabolic process (GO:0008152)                             |                                                            | 4840                                                     | 21                        | 1.27E-05              |
